# Supplementary material for: Production of New Isoflavone Diglucosides from Glycosylation of 8-Hydroxydaidzein by Deinococcus geothermalis Amylosucrase
Source: MDPI journal article supplement (doi:10.3390/fermentation7040232), 2021-10-16
Supplement: s1 [file s1]

---

# Supplementary Materials: Production of New Isoflavone Diglucosides from Glycosylation of 8-Hydroxydaidzein by *Deinococcus geothermalis* Amylosucrase

Chien-Min Chiang,<sup>1,†</sup> Tzi-Yuan Wang,<sup>2,†</sup> Jiumn-Yih Wu,<sup>3,†</sup> Yun-Rong Zhang,<sup>4</sup> Shu-Yuan Lin,<sup>4</sup> and Te-Sheng Chang<sup>4,\*</sup>

<sup>1</sup> Department of Pharmacy, Chia Nan University of Pharmacy and Science, No. 60, Sec. 1, Erh-Jen Rd., Jen-Te District, Tainan 71710, Taiwan; cmchiang@mail.cnu.edu.tw

<sup>2</sup> Biodiversity Research Center, Academia Sinica, Taipei 11529, Taiwan; tziyuan@gmail.com

<sup>3</sup> Department of Food Science, National Quemoy University, Kinmen County 892, Taiwan; wujy@nqu.edu.tw

<sup>4</sup> Department of Biological Sciences and Technology, National University of Tainan, Tainan 70005, Taiwan; mozyme2001@gmail.com (T.-S. C.); S10758011@gm2.nutn.edu.tw (Y.-R. Z.); doreen890513@gmail.com (S.-Y. L.)

\* Correspondence: mozyme2001@gmail.com; Tel./Fax: +886-6-2602137

+ These authors contributed equally to this manuscript

---

Figure S1. Sodium dodecyl sulfate polyacrylamide gel electrophoresis (SDS-PAGE) analysis of purified DgAS.

Figure S2. High-performance liquid chromatography (HPLC) analysis of the biotransformation products of 8-OHDe produced by heat-inactivated DgAS.

Figure S3. Mass analysis of compound (1).

Figure S4. Mass analysis of compound (2).

Figure S5. Mass analysis of compound (3).

Figure S6. The  $^1\text{H}$ -NMR (700 MHz,  $\text{DMSO-}d_6$ ) spectrum of compound (1).

Figure S7. The  $^{13}\text{C}$ -NMR (176 MHz,  $\text{DMSO-}d_6$ ) spectrum of compound (1).

Figure S8. The DEPT-135 (176 MHz,  $\text{DMSO-}d_6$ ) spectrum of compound (1).

Figure S9. The H-H COSY (700 MHz,  $\text{DMSO-}d_6$ ) spectrum of compound (1).

Figure S10. The H-H NOESY (700 MHz,  $\text{DMSO-}d_6$ ) spectrum of compound (1).

Figure S11. The HSQC (700 MHz,  $\text{DMSO-}d_6$ ) spectrum of compound (1).

Figure S12. The HMBC (700 MHz,  $\text{DMSO-}d_6$ ) spectrum of compound (1).

Figure S13. The  $^1\text{H}$ -NMR (700 MHz,  $\text{DMSO-}d_6$ ) spectrum of compound (2).

Figure S14. The  $^{13}\text{C}$ -NMR (176 MHz,  $\text{DMSO-}d_6$ ) spectrum of compound (2).

Figure S15. The DEPT-135 (176 MHz,  $\text{DMSO-}d_6$ ) spectrum of compound (2).

Figure S16. The H-H COSY (700 MHz,  $\text{DMSO-}d_6$ ) spectrum of compound (2).

Figure S17. The H-H NOESY (700 MHz,  $\text{DMSO-}d_6$ ) spectrum of compound (2).

---

Figure S18. The HSQC (700 MHz, DMSO- $d_6$ ) spectrum of compound (**2**).

Figure S19. The HMBC (700 MHz, DMSO- $d_6$ ) spectrum of compound (**2**).

Figure S20. The key HMBC and NOESY correlations of compound (**1**) and compound (**2**).

---

kDa    Lane 1    Lane 2

100

75

63

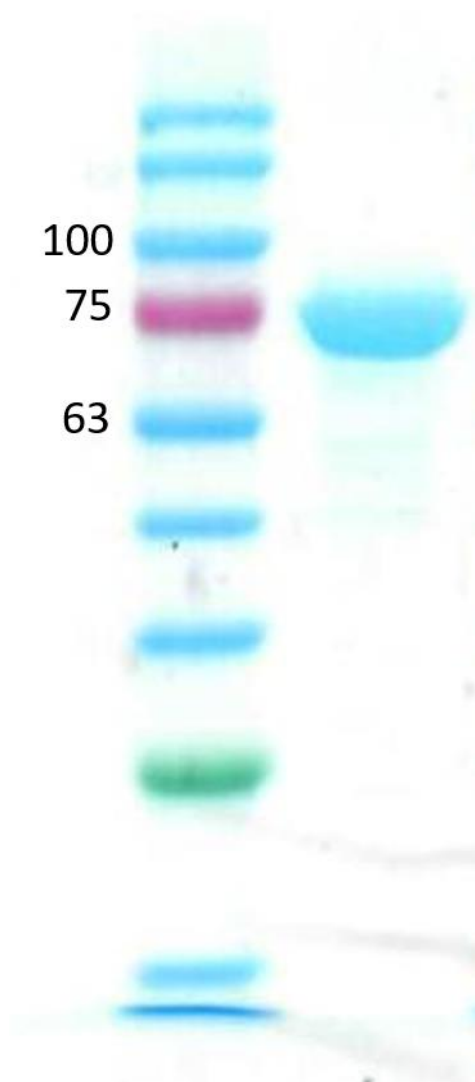

Figure S1. Sodium dodecyl sulfate polyacrylamide gel electrophoresis (SDS-PAGE) analysis of purified DgAS. Lane 1 is protein marker and lane 2 is the purified DgAS.

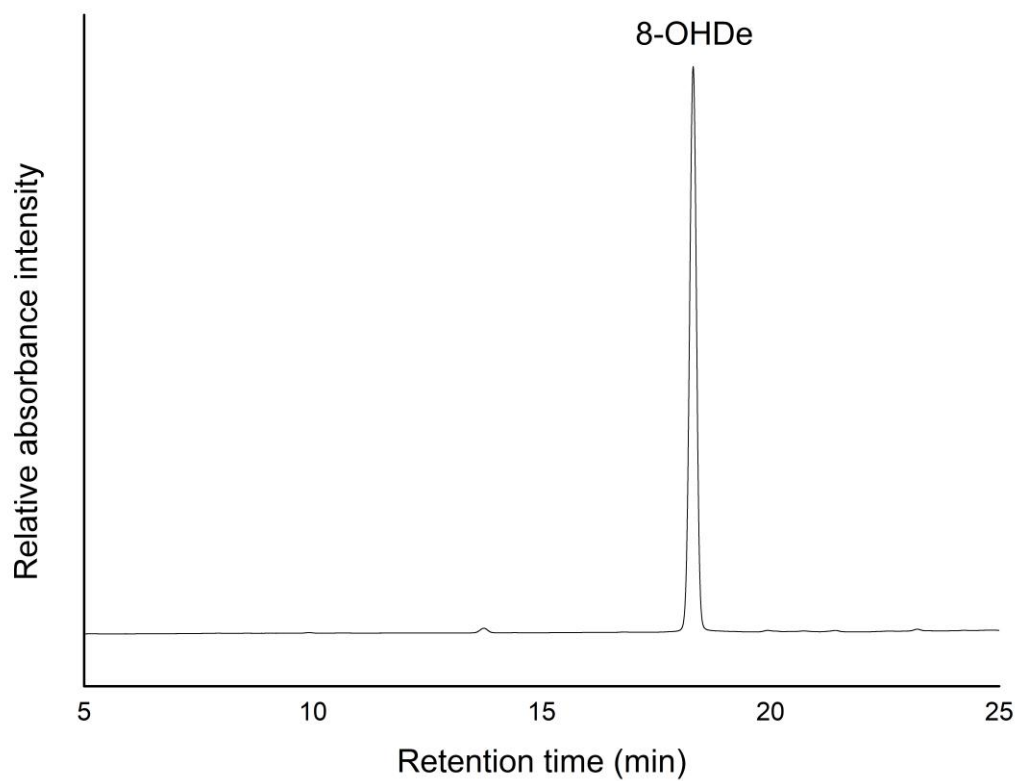

Figure S2. High-performance liquid chromatography (HPLC) analysis of the biotransformation products of 8-OHDe produced by heat-inactivated DgAS. The reaction condition was the same as that in Figure 1 but the DgAS was heated at 95 °C for 30 min before used.

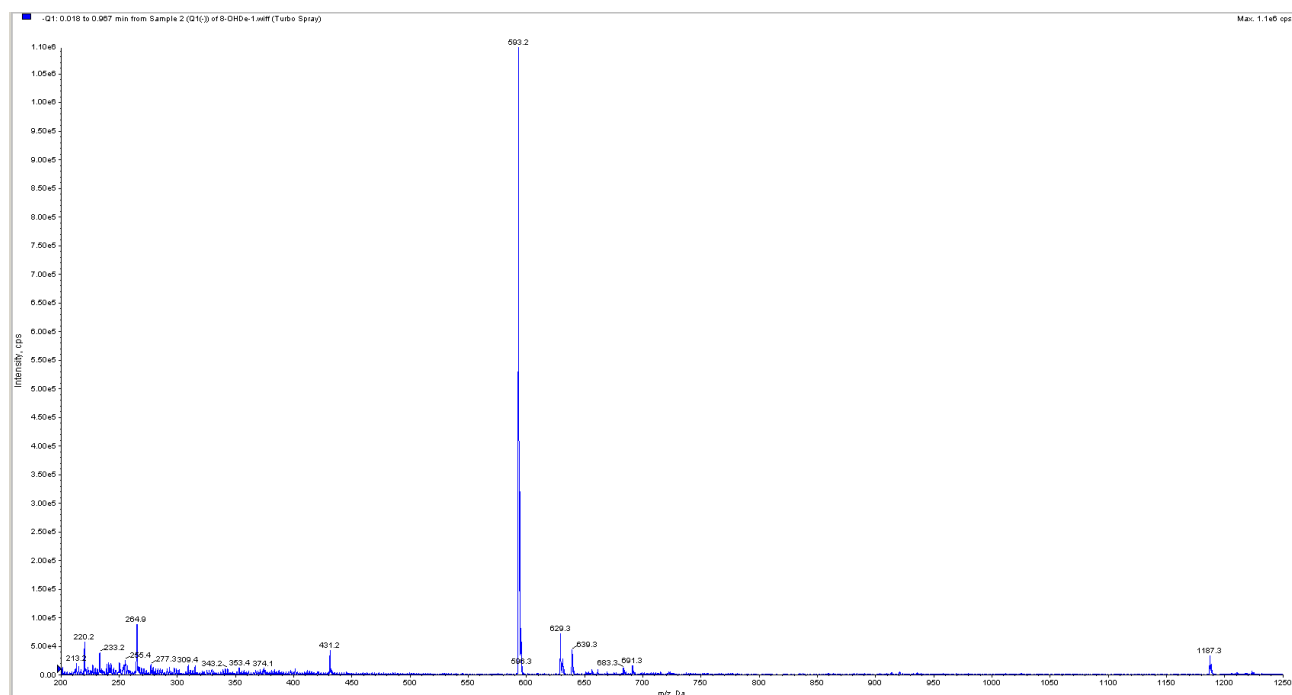

**Figure S3.** Mass analysis of compound (**1**) at the negative mode. A significant signal at  $m/z$  593.2 showed the corresponding  $m/z$  signal of molecular weight 594 of 8-OHDe-diglucoside at the negative mode.

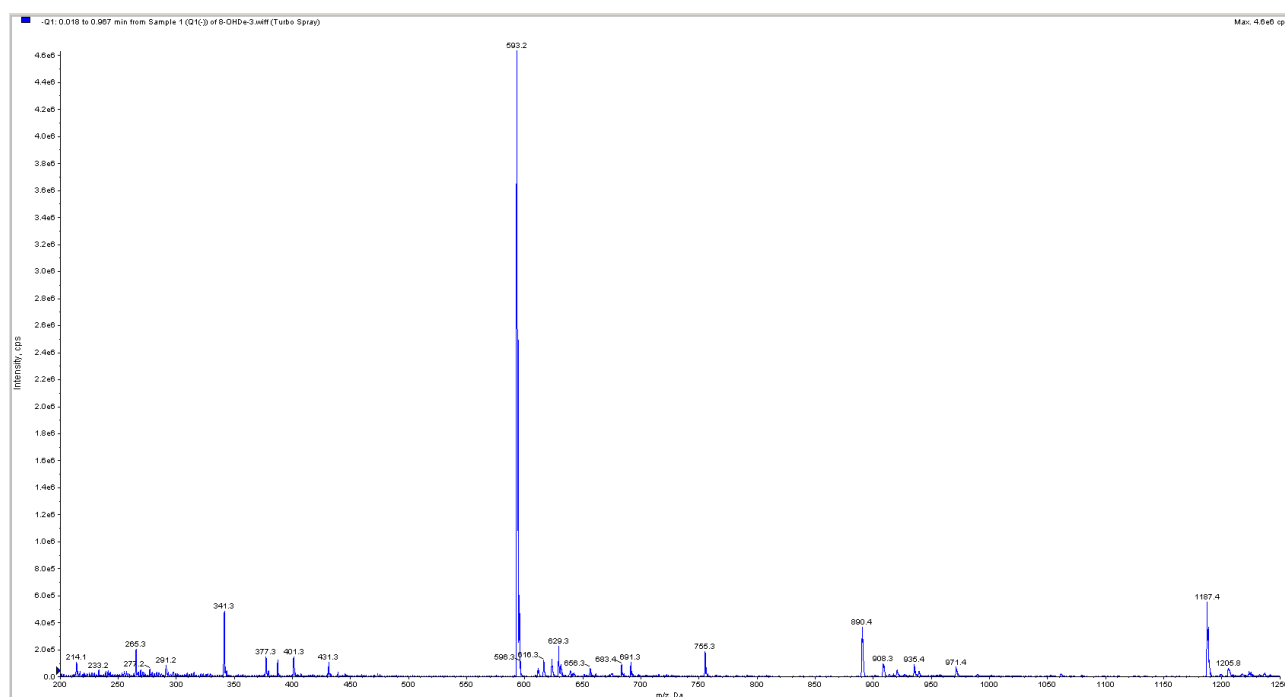

**Figure S4.** Mass analysis of compound (2) at the negative mode. A significant signal at  $m/z$  593.2 showed the corresponding  $m/z$  signal of molecular weight 594 of 8-OHDe-diglucoside at the negative mode.

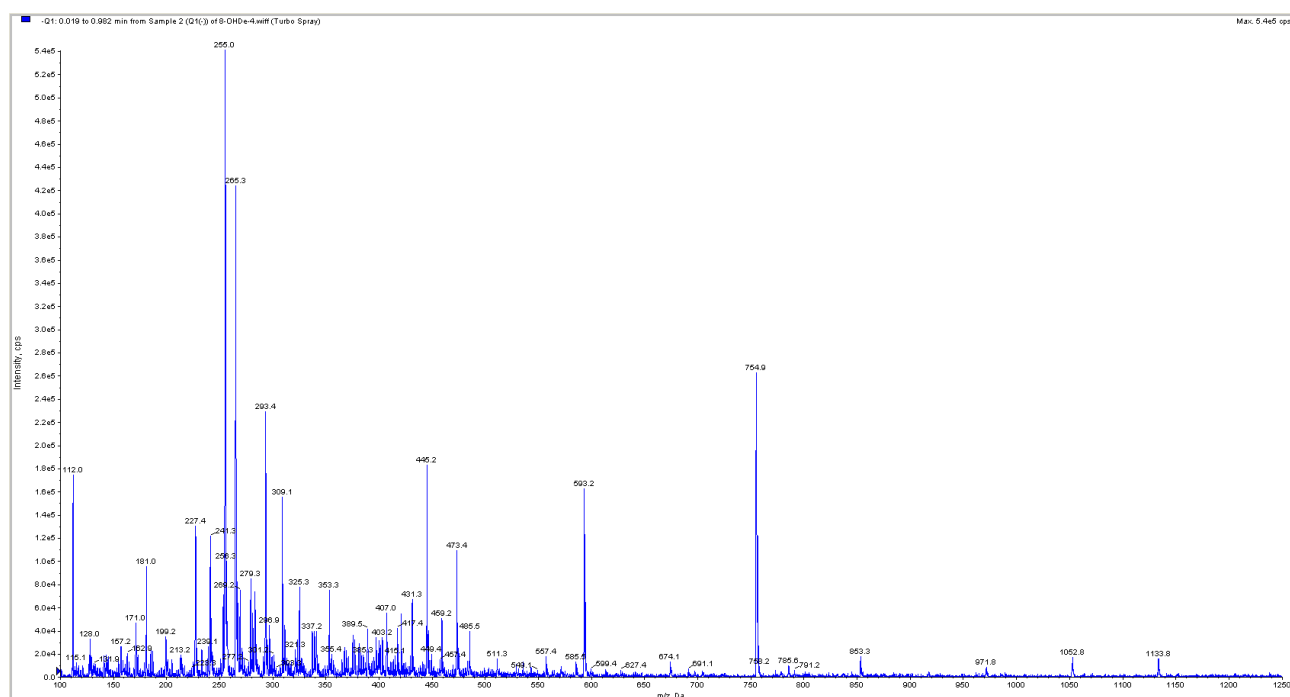

**Figure S5.** Mass analysis of compound (3) at the negative mode. A significant signal at  $m/z$  755.2 showed the corresponding  $m/z$  signal of molecular weight 756 of 8-OHDe-triglucoside at the negative mode.



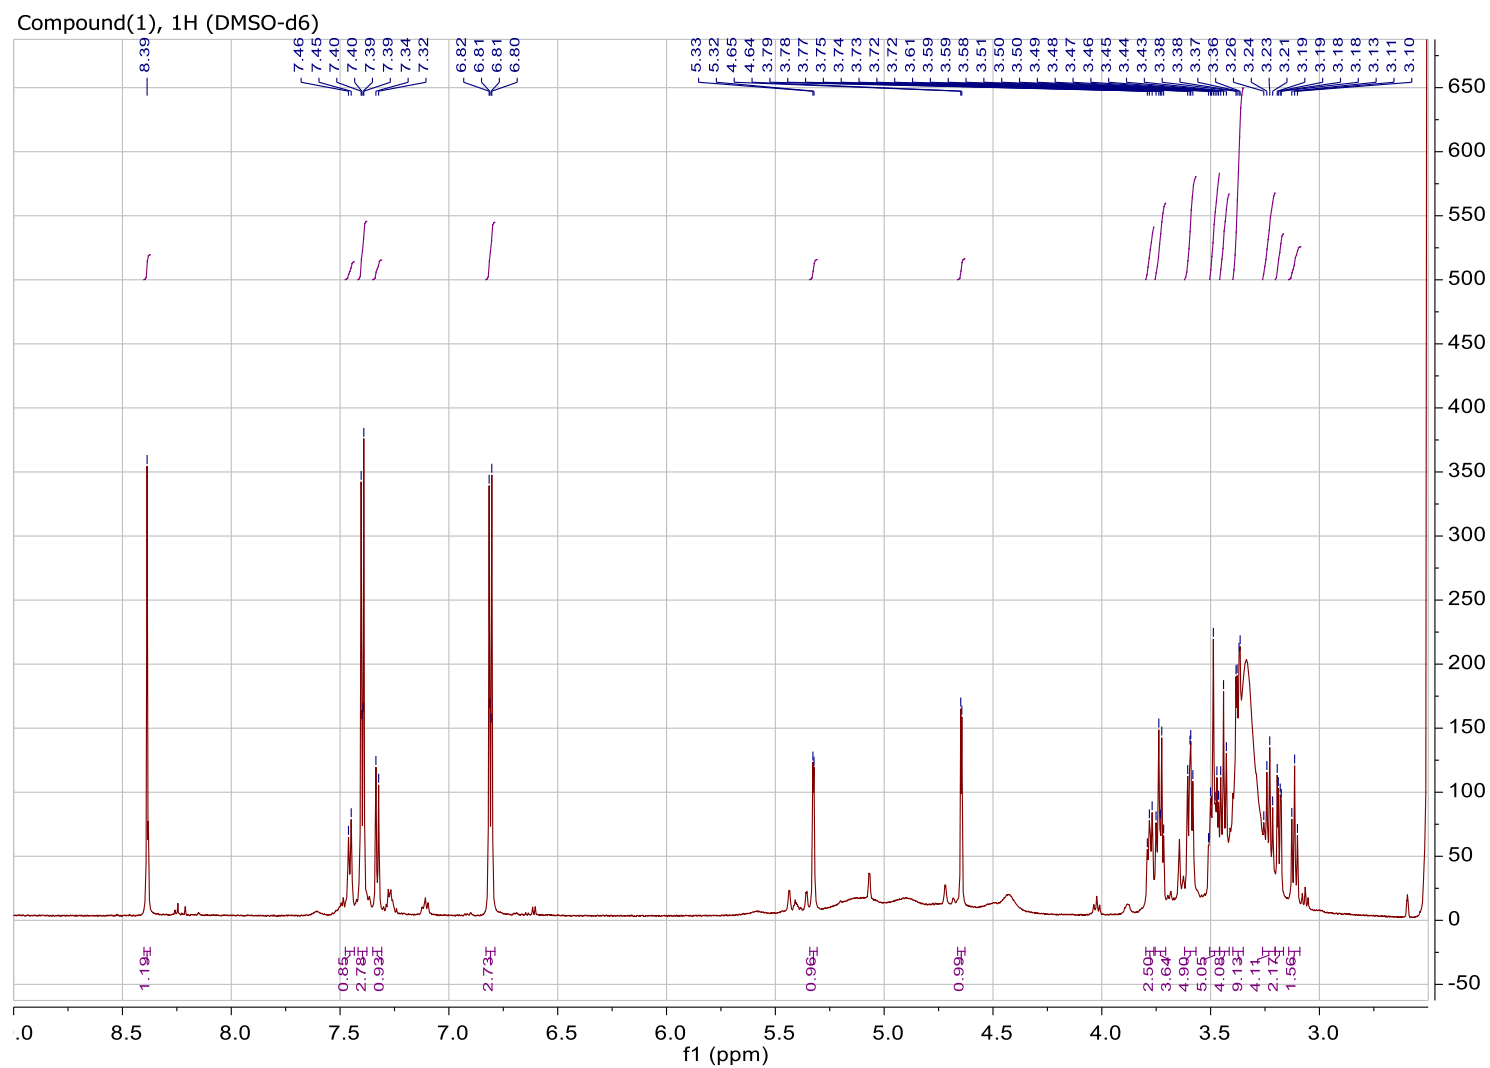

Figure S6. The  $^1\text{H}$ -NMR (700 MHz, DMSO- $d_6$ ) spectrum of compound (1).

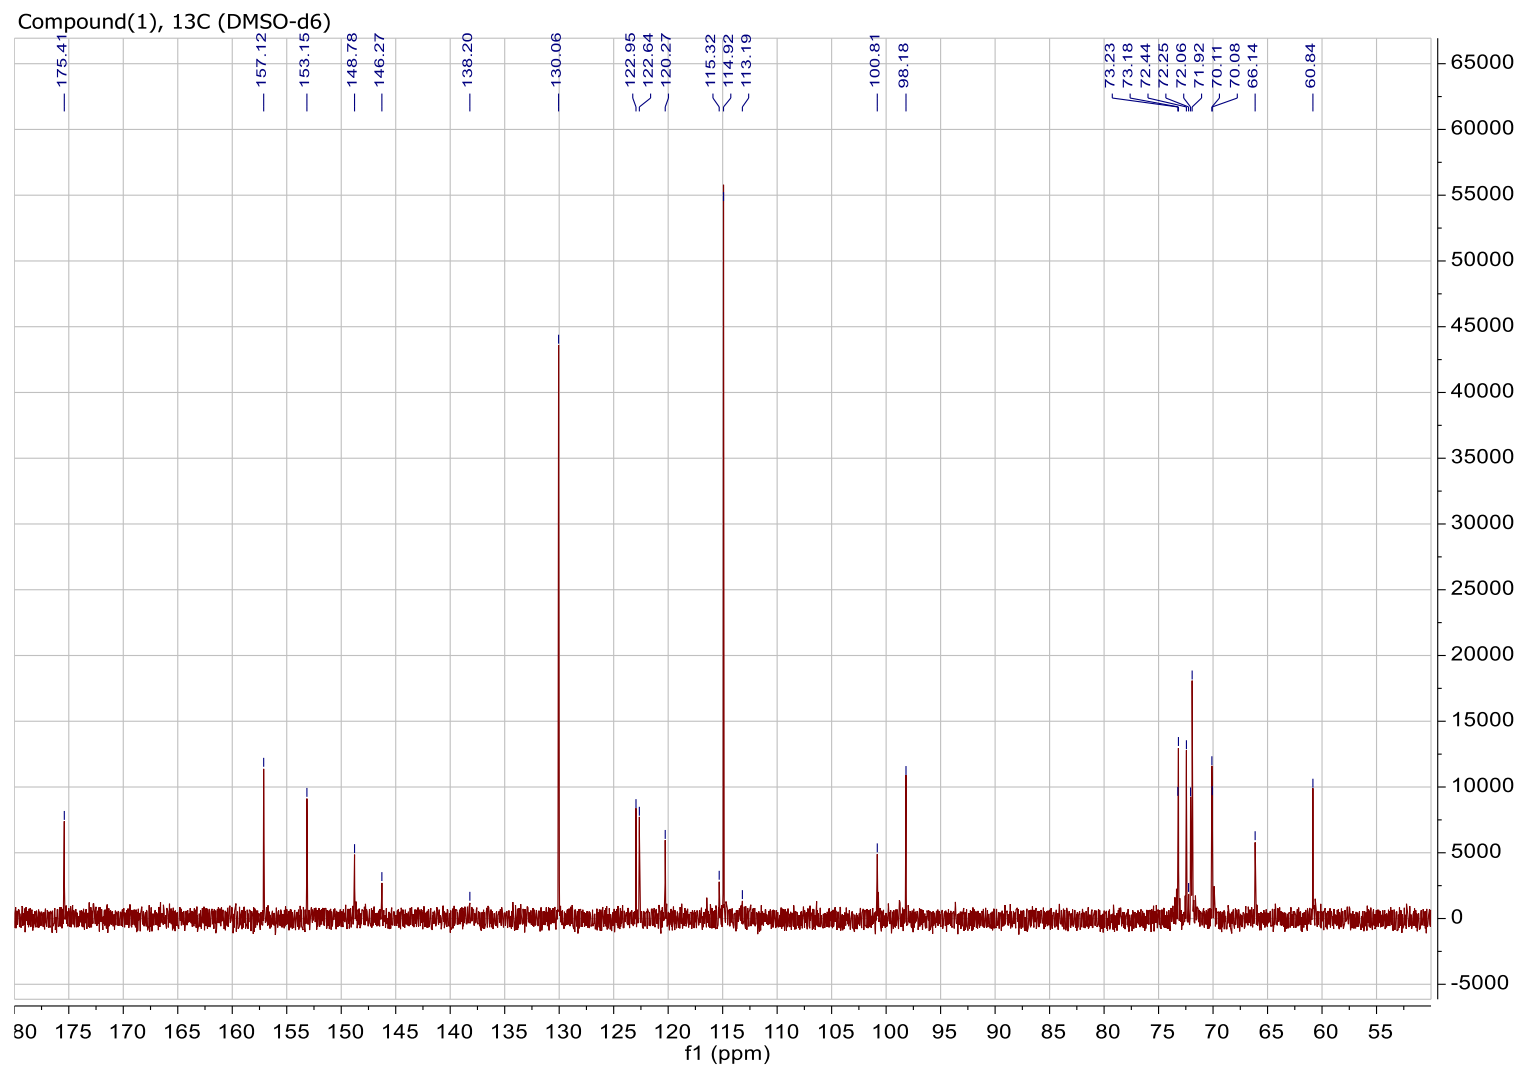

Figure S7. The  $^{13}\text{C}$ -NMR (176 MHz, DMSO- $d_6$ ) spectrum of compound (**1**).

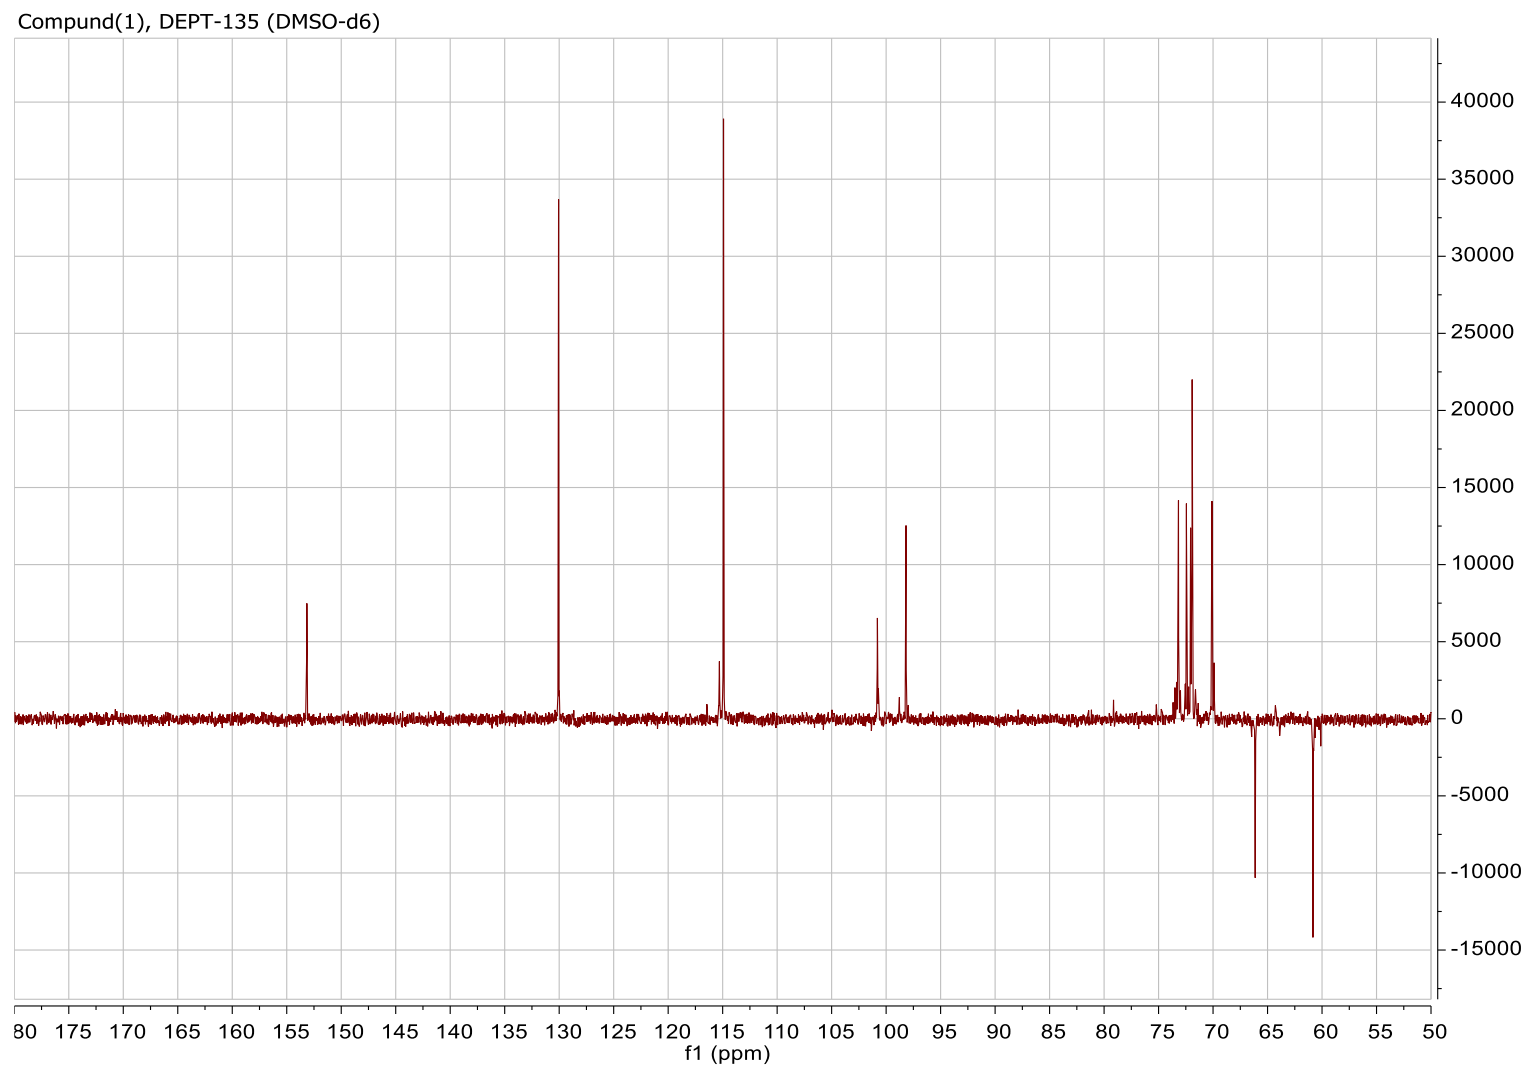

Figure S8. The DEPT-135 (176 MHz DMSO-*d*<sub>6</sub>) spectrum of compound (**1**).

Compound(1), H-H COSY (DMSO-d<sub>6</sub>)

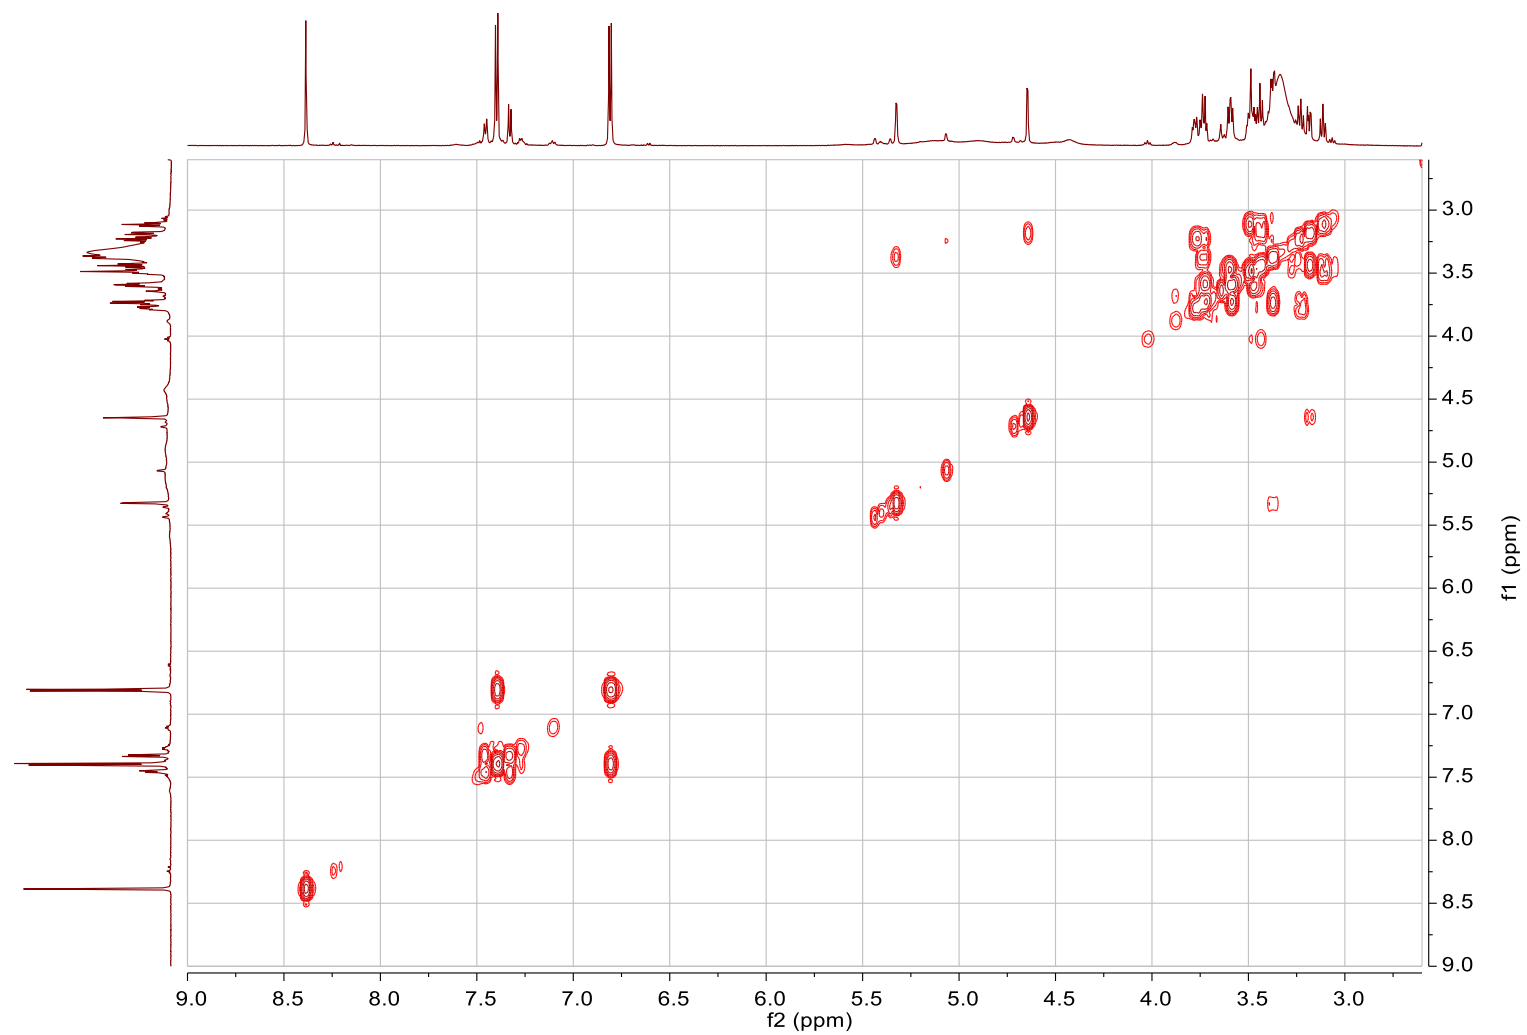

Figure S9. The H-H COSY (700 MHz DMSO-*d*<sub>6</sub>) spectrum of compound (1).

Compound(1), H-H NOESY (DMSO-d<sub>6</sub>)

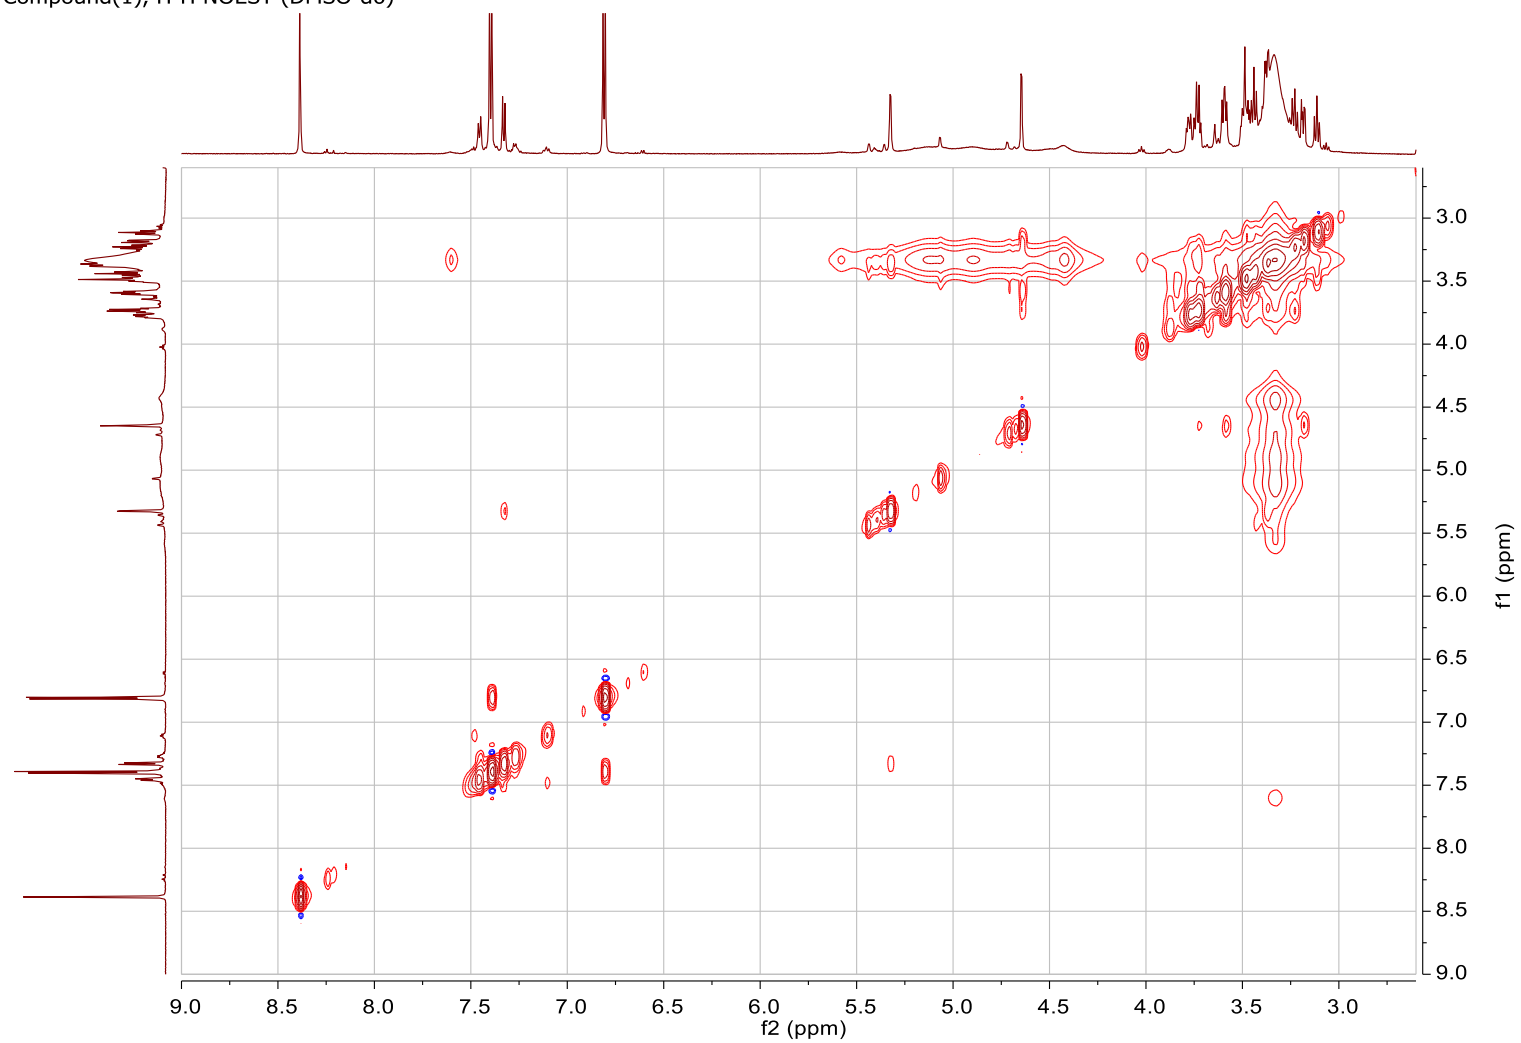

Figure S10. The H-H NOESY (700 MHz DMSO-*d*<sub>6</sub>) spectrum of compound (**1**).

Compound(1), HSQC (DMSO- $d_6$ )

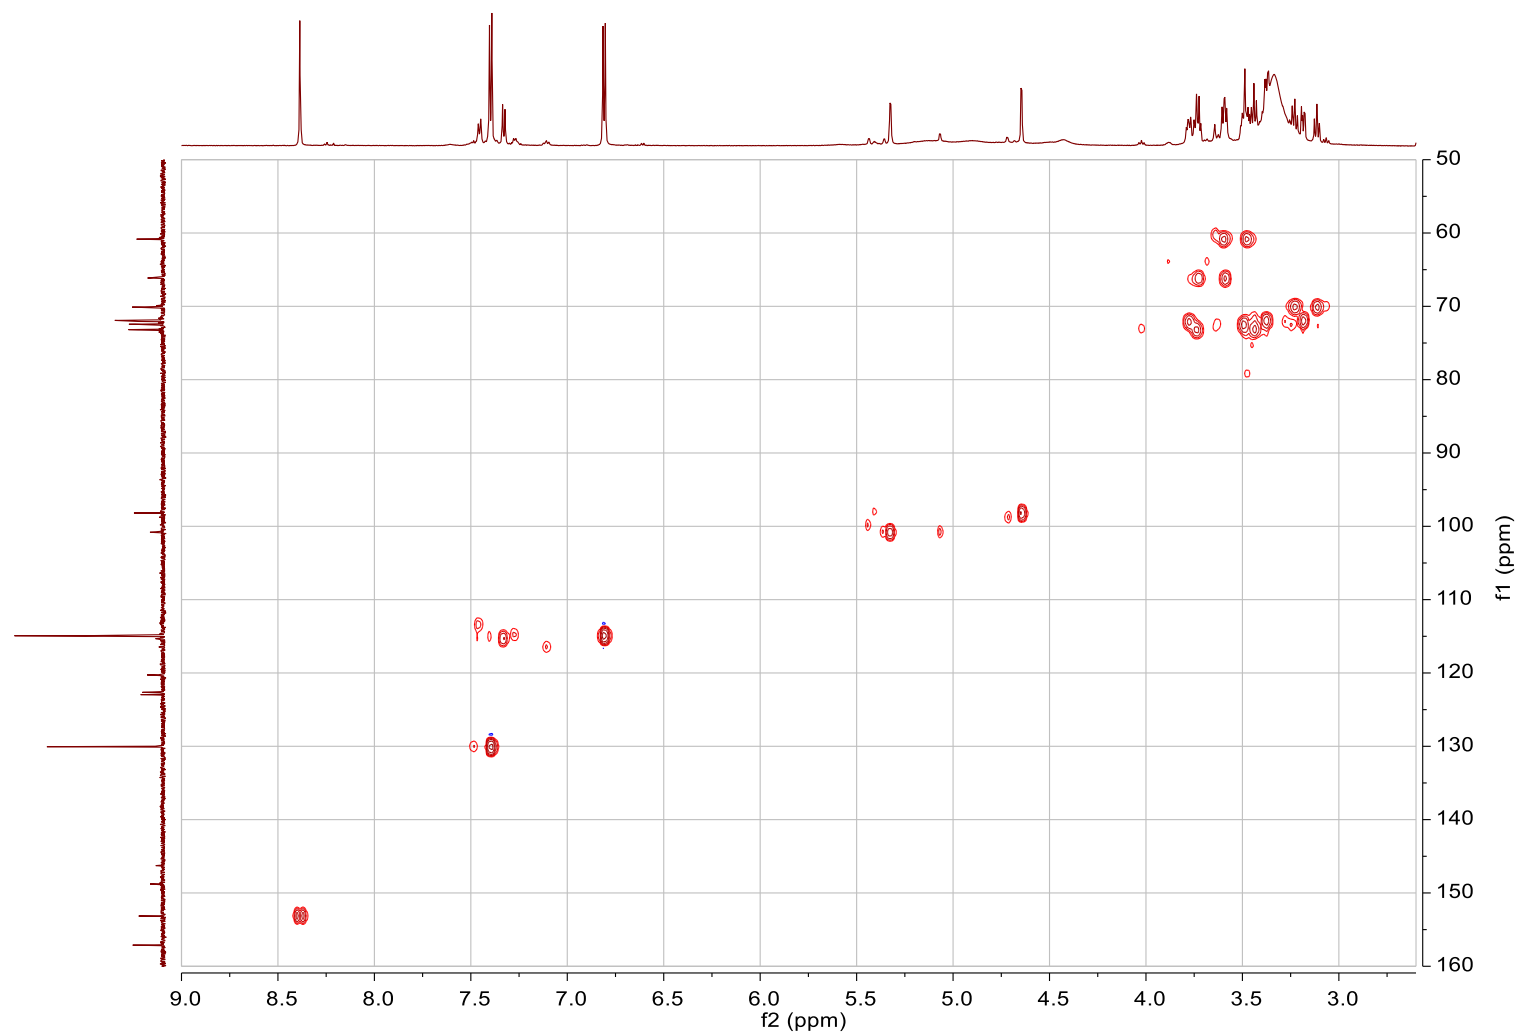

Figure S11. The HSQC (700 MHz DMSO- $d_6$ ) spectrum of compound (1).

Compound(1), HMBC (DMSO- $d_6$ )

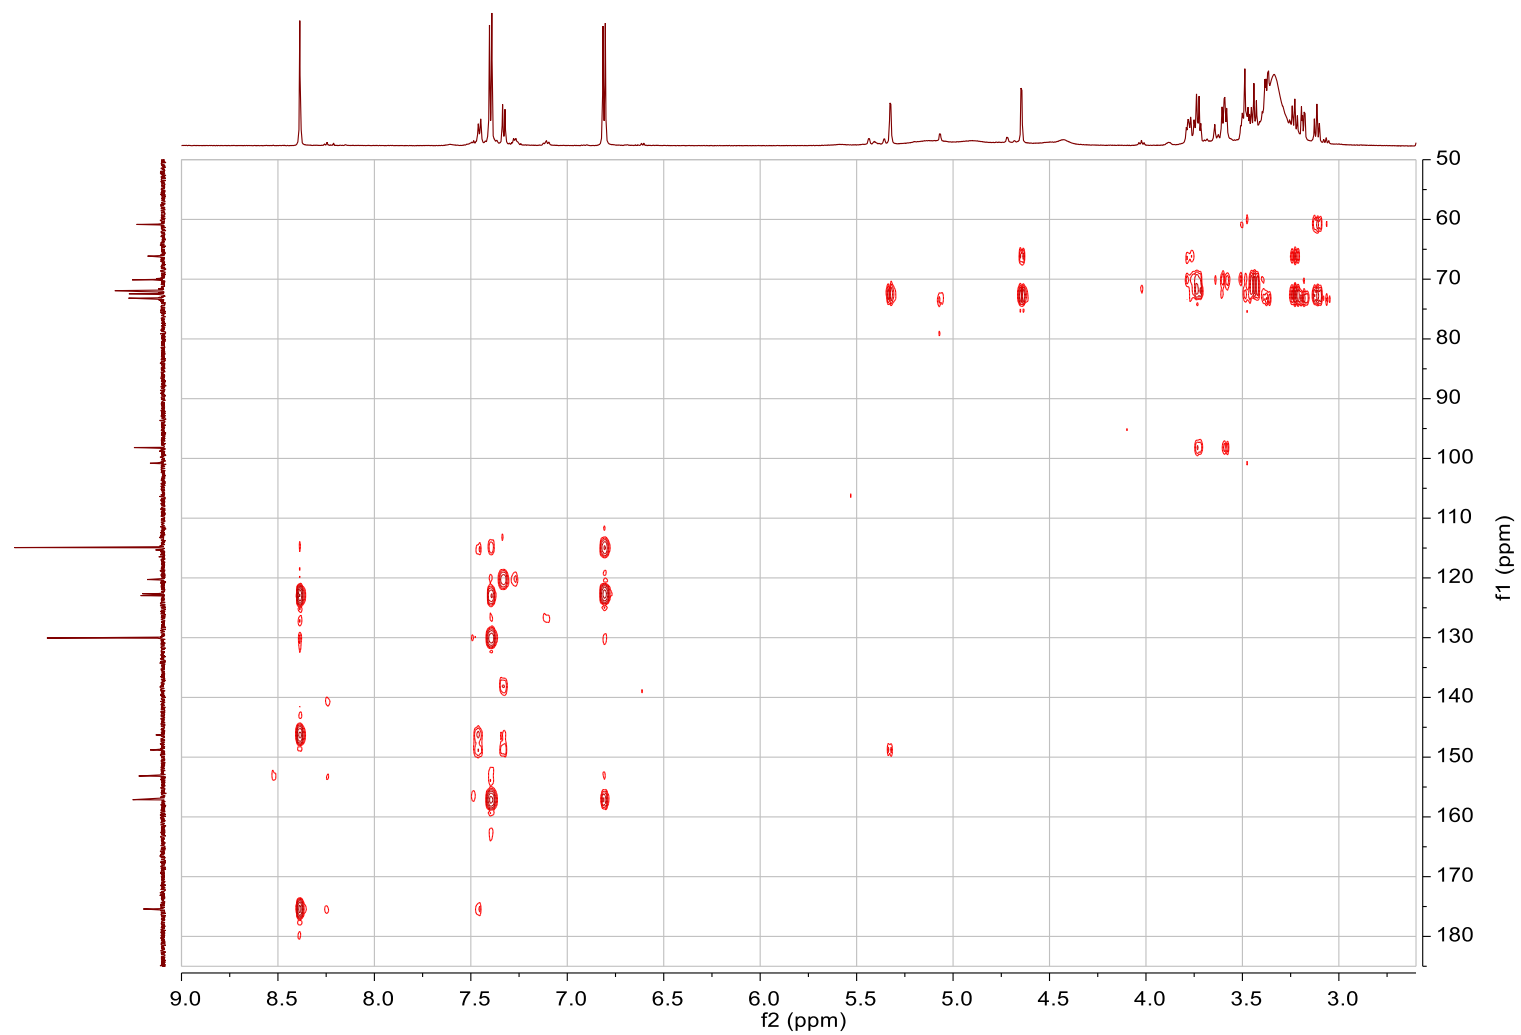

Figure S12. The HMBC (700 MHz DMSO- $d_6$ ) spectrum of compound (1).

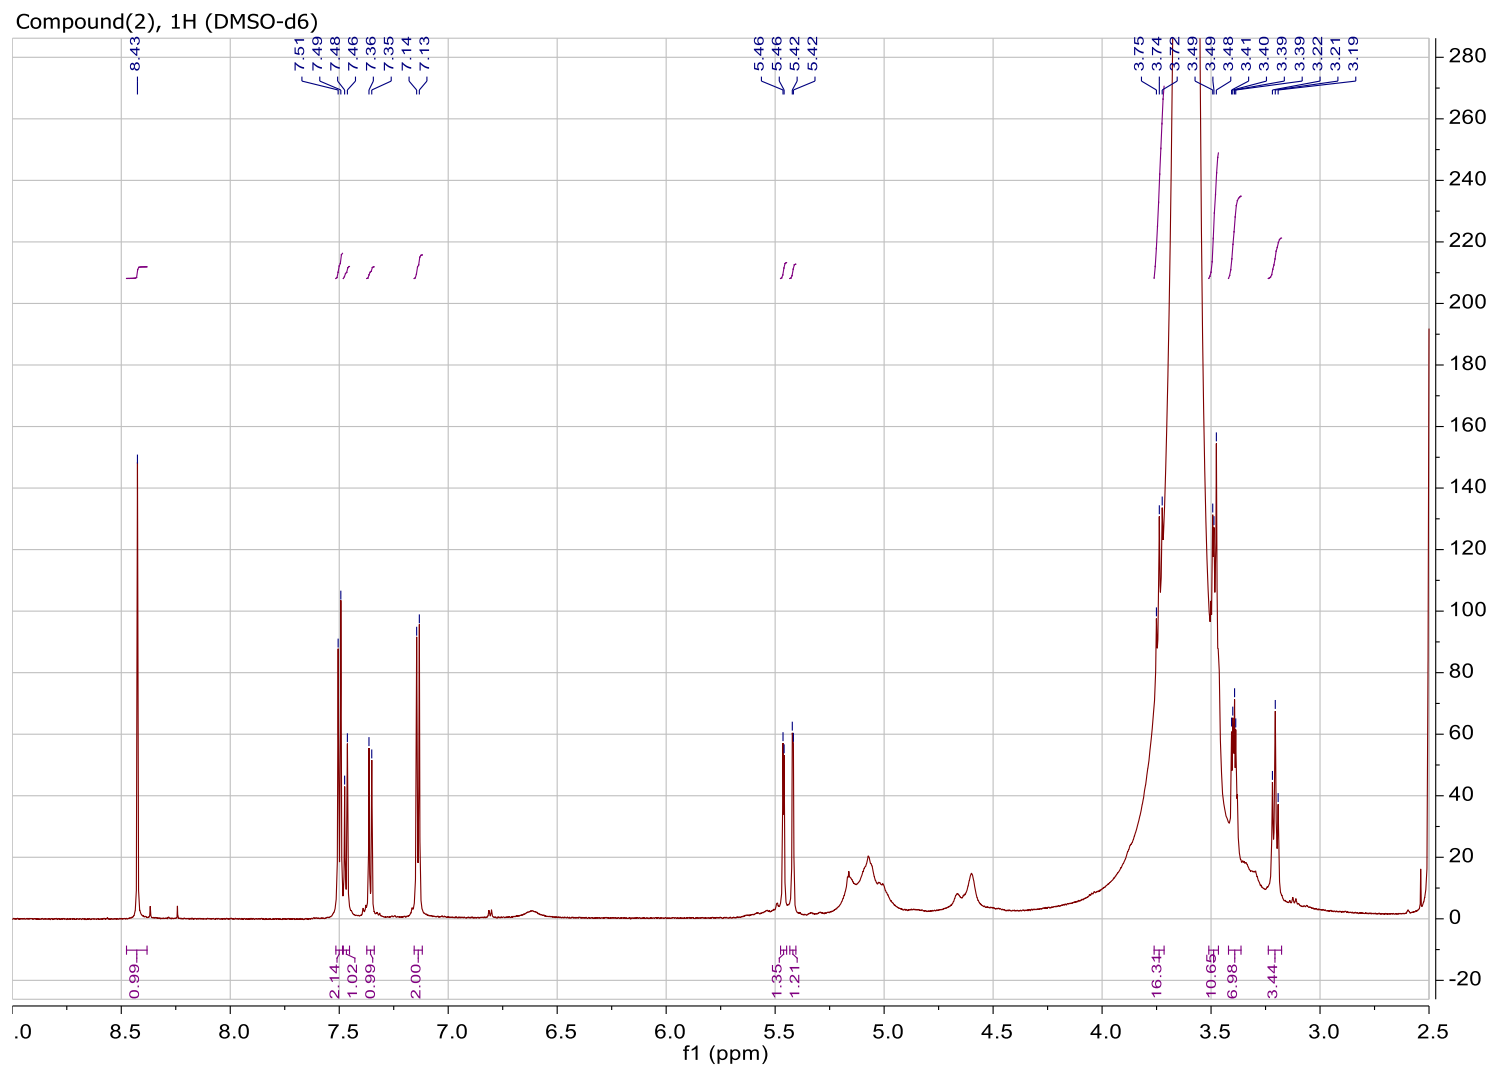

Figure S13. The  $^1\text{H}$ -NMR (700 MHz,  $\text{DMSO-}d_6$ ) spectrum of compound (2).



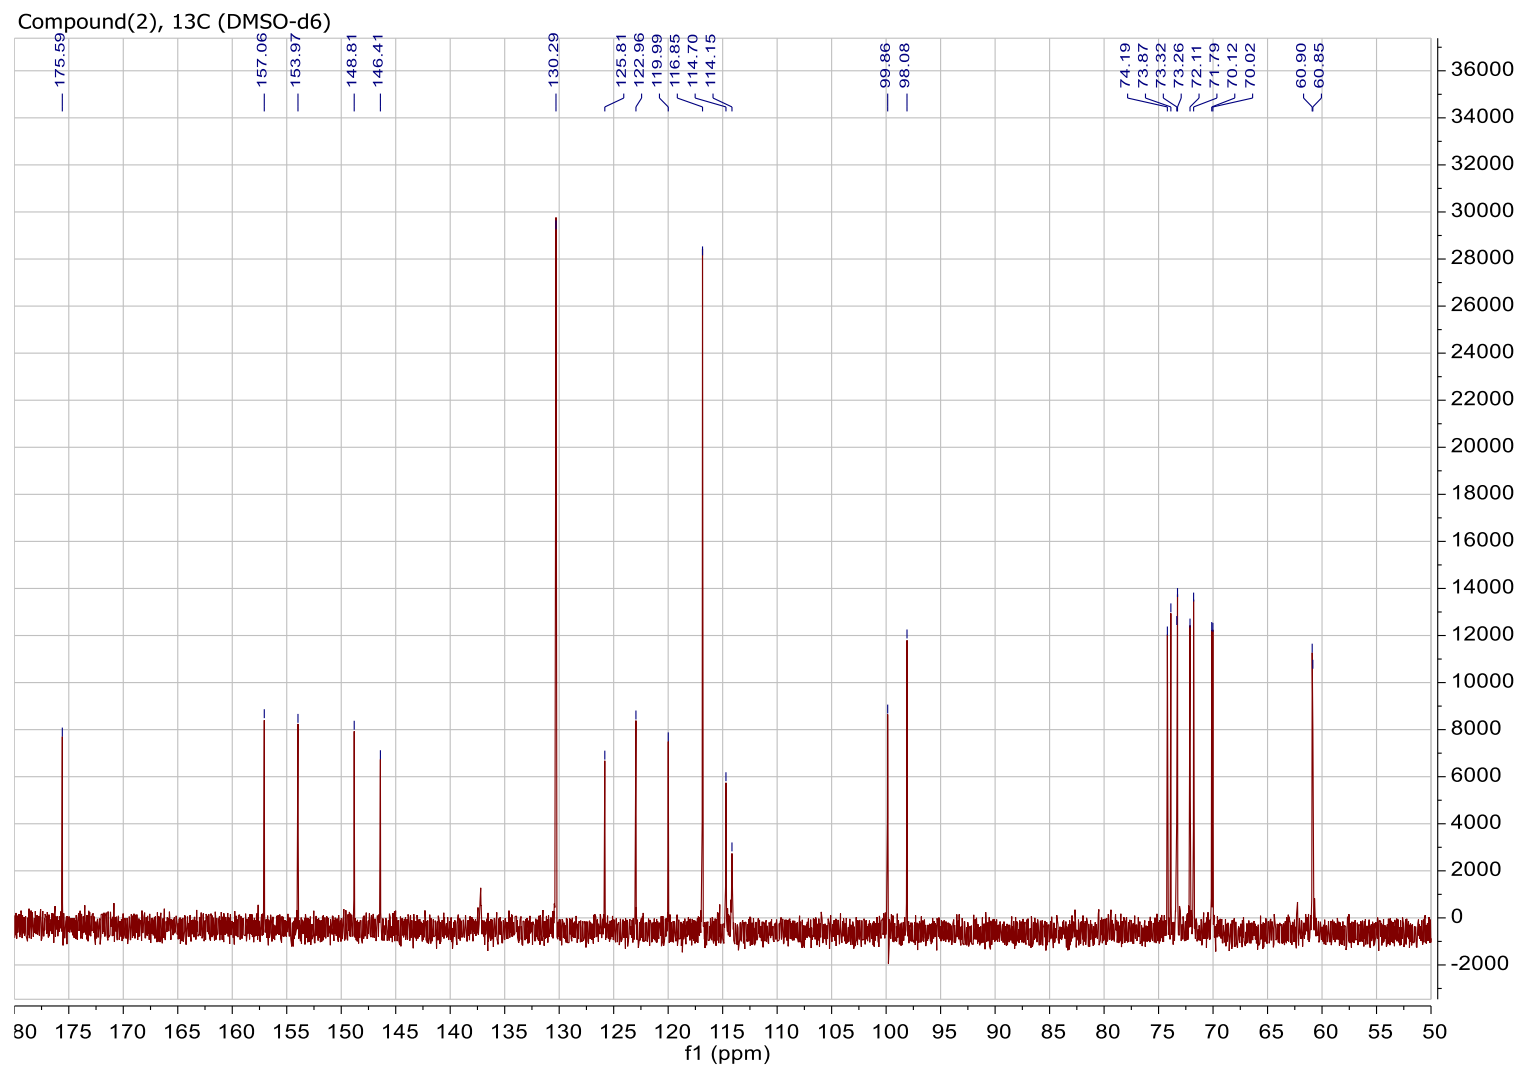

Figure S14. The  $^{13}\text{C}$ -NMR (176 MHz, DMSO- $d_6$ ) spectrum of compound (2).

Compound(2), DEPT-135 (DMSO-d<sub>6</sub>)

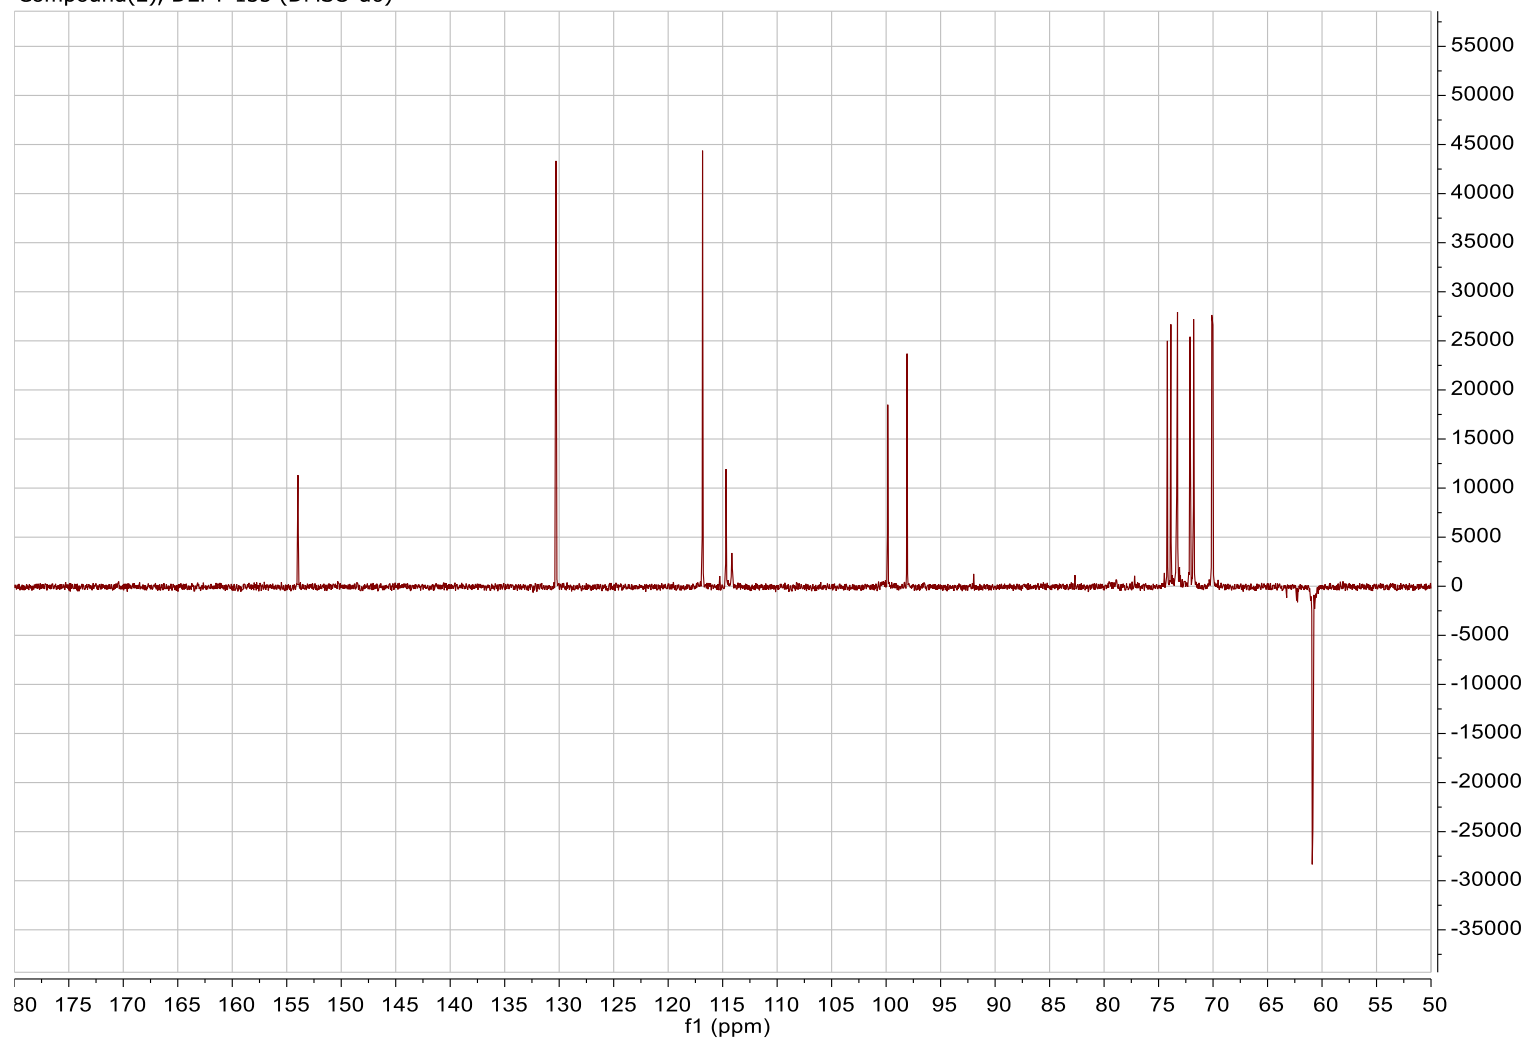

Figure S15. The DEPT-135 (176 MHz, DMSO-*d*<sub>6</sub>) spectrum of compound (**2**).

Compound(2), H-H COSY (DMSO-d<sub>6</sub>)

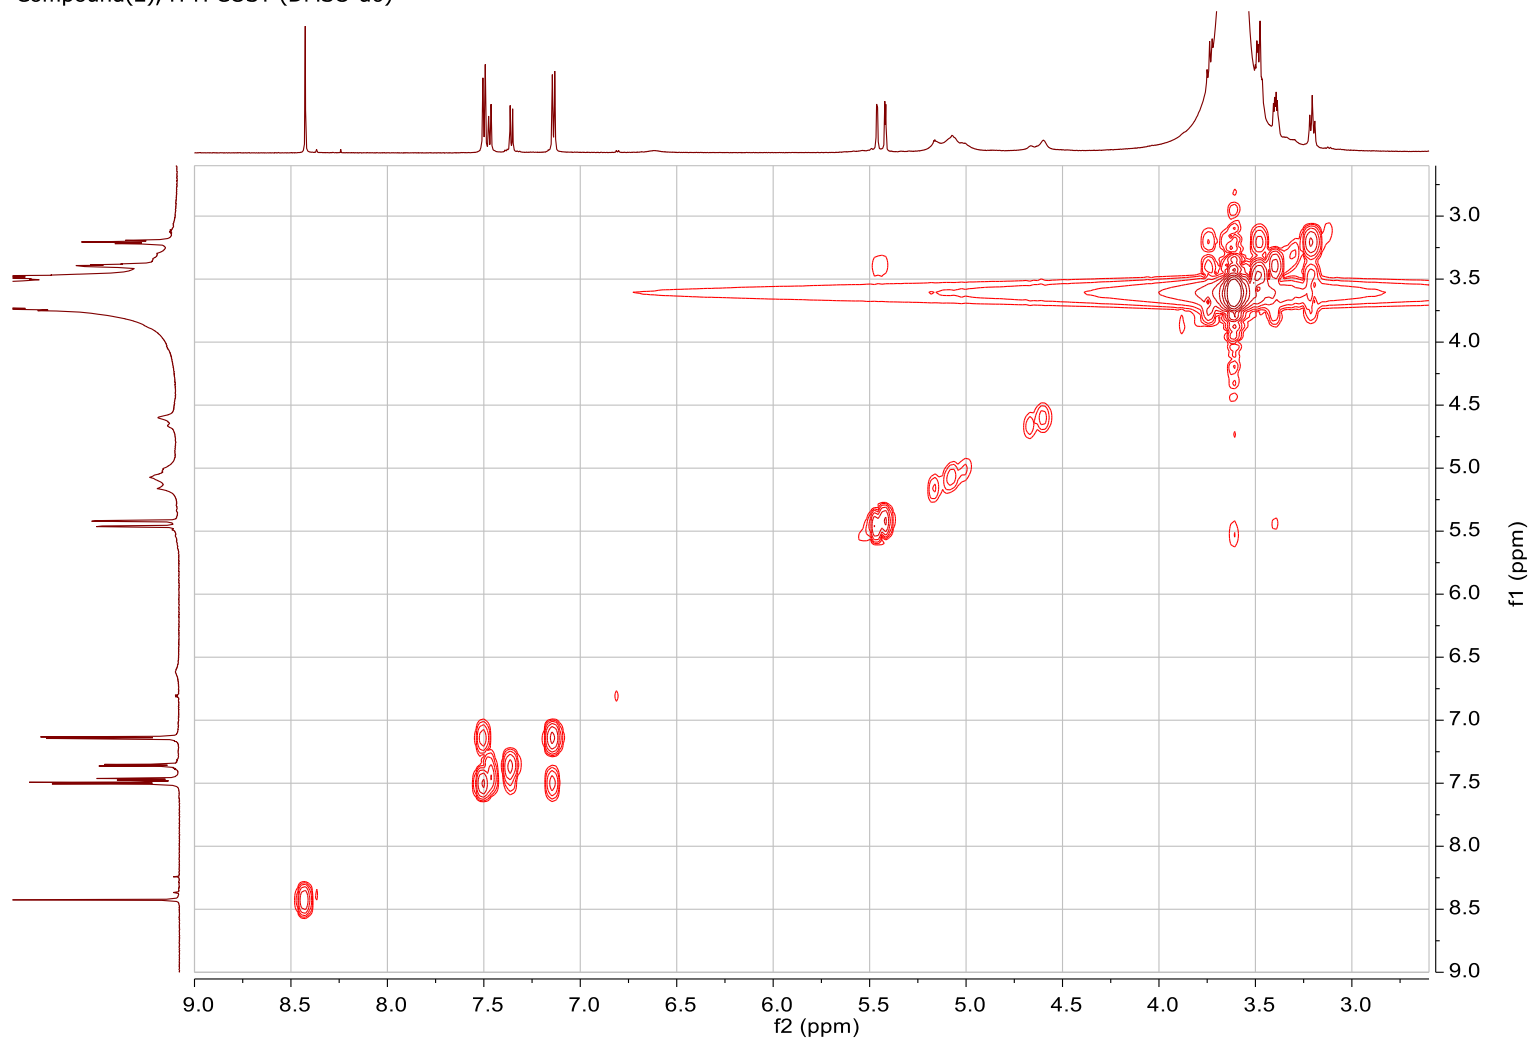

Figure S16. The H-H COSY (700 MHz, DMSO-*d*<sub>6</sub>) spectrum of compound (2).

Compound(2), H-H NOESY (DMSO- $d_6$ )

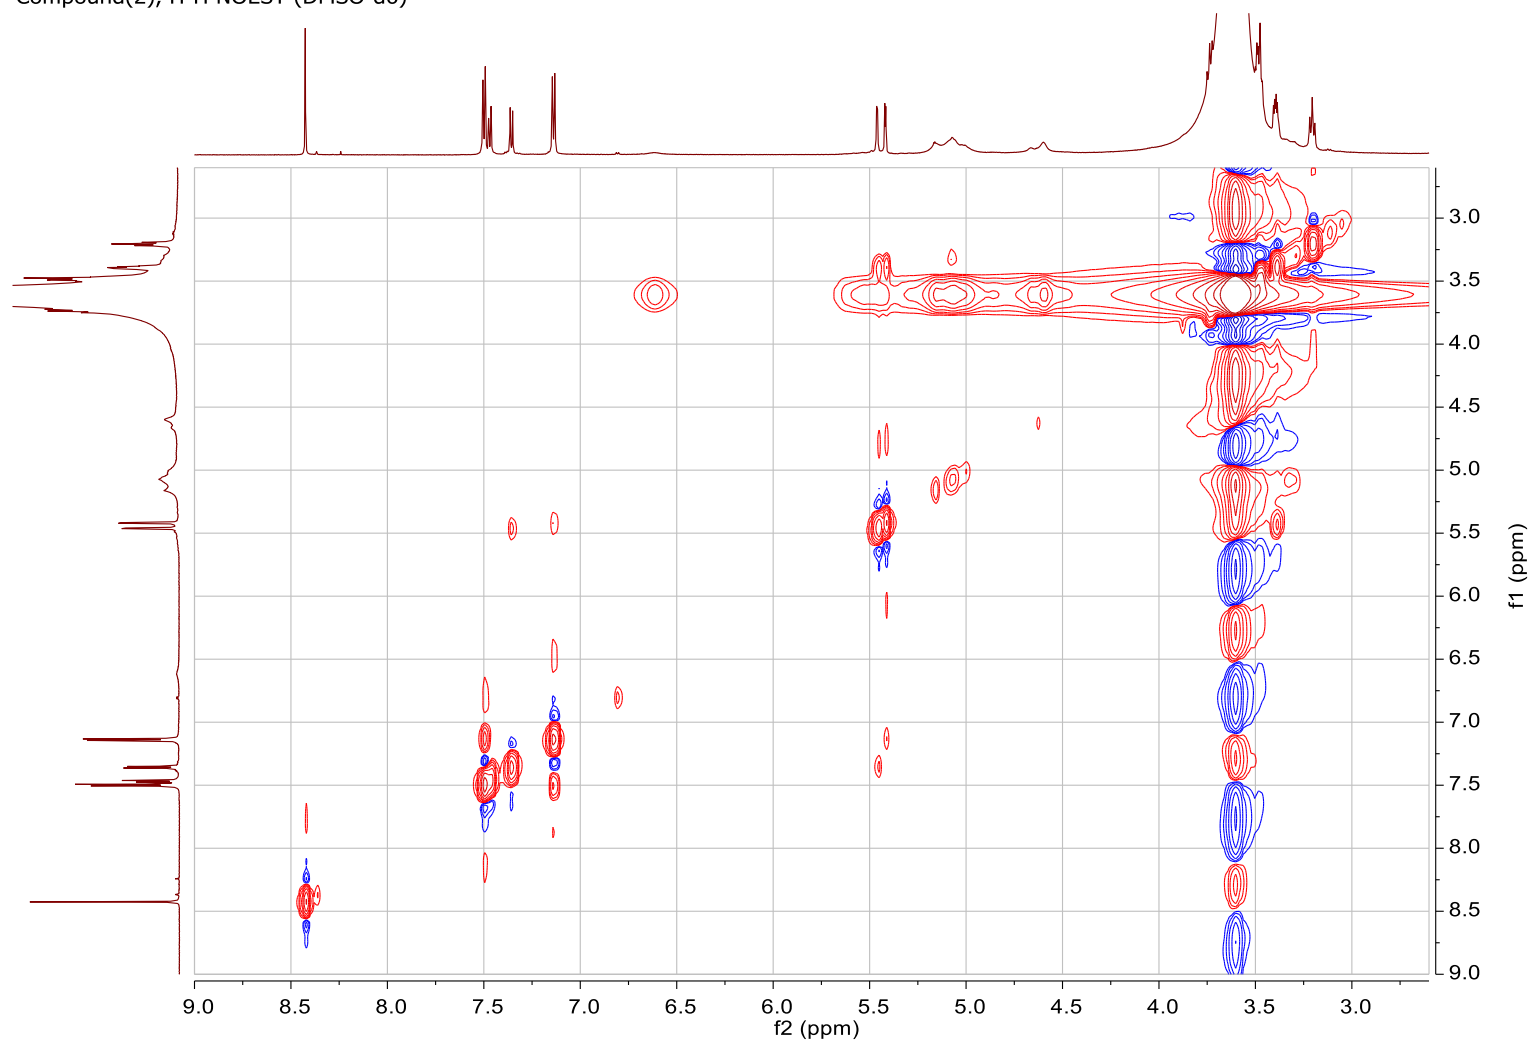

Figure S17. The H-H NOESY (700 MHz, DMSO- $d_6$ ) spectrum of compound (2).

Compound(2), HSQC (DMSO-d<sub>6</sub>)

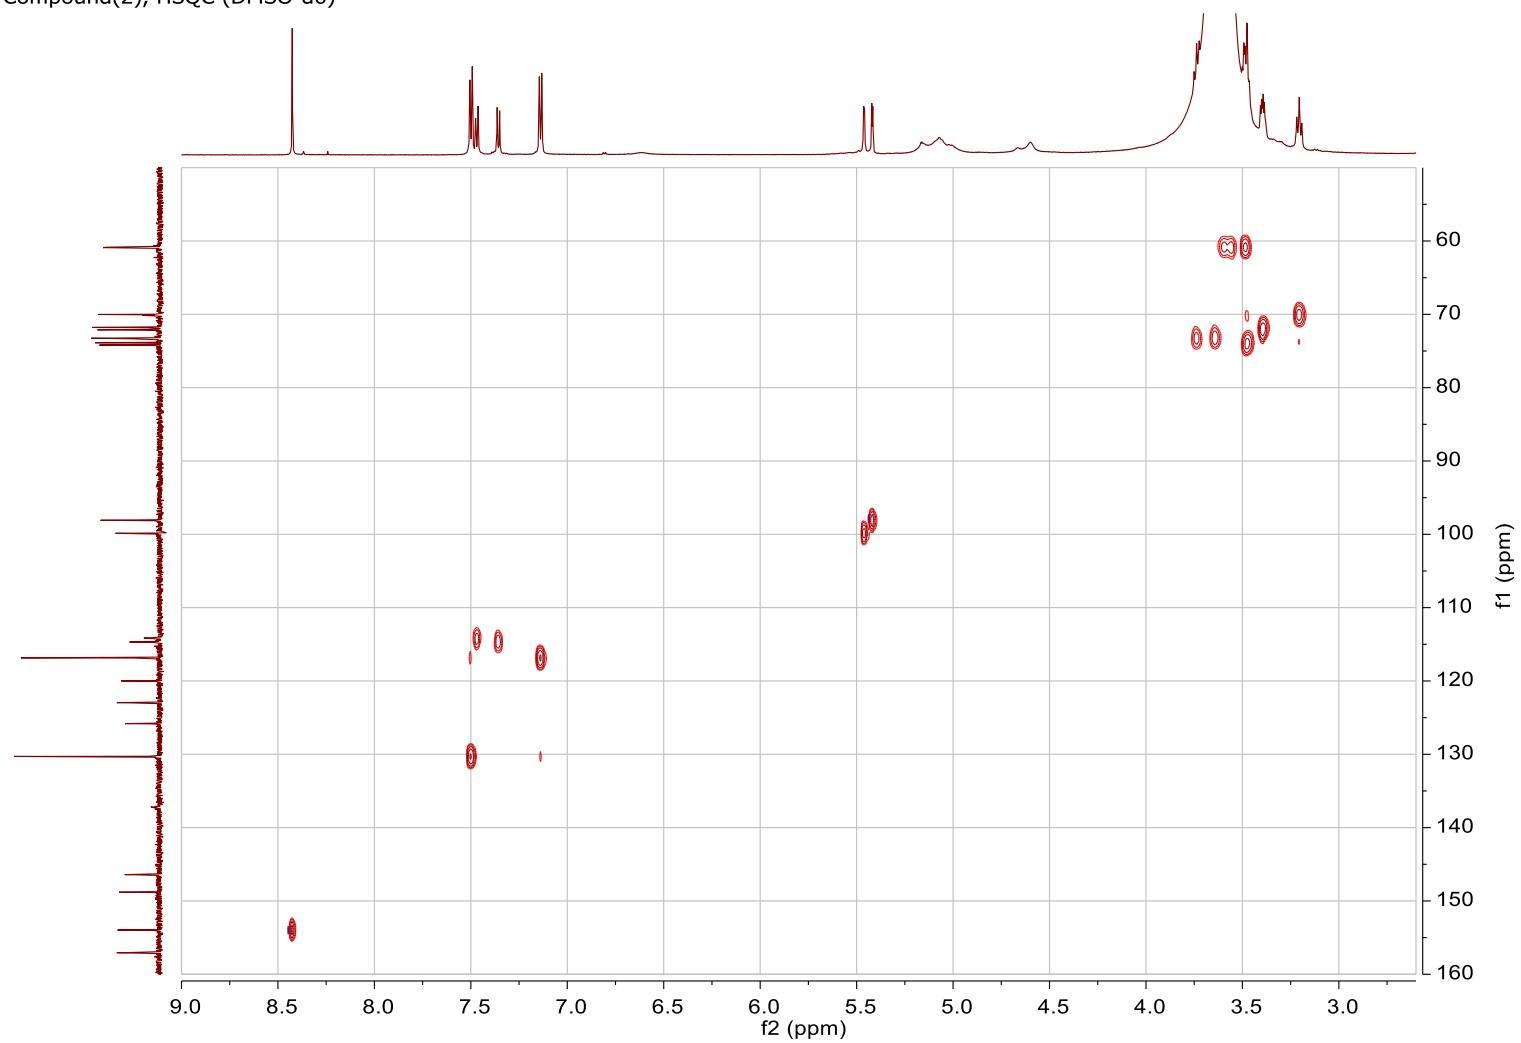

Figure S18. The HSQC (700 MHz, DMSO-*d*<sub>6</sub>) spectrum of compound (2).

Compound(2), HMBC (DMSO- $d_6$ )

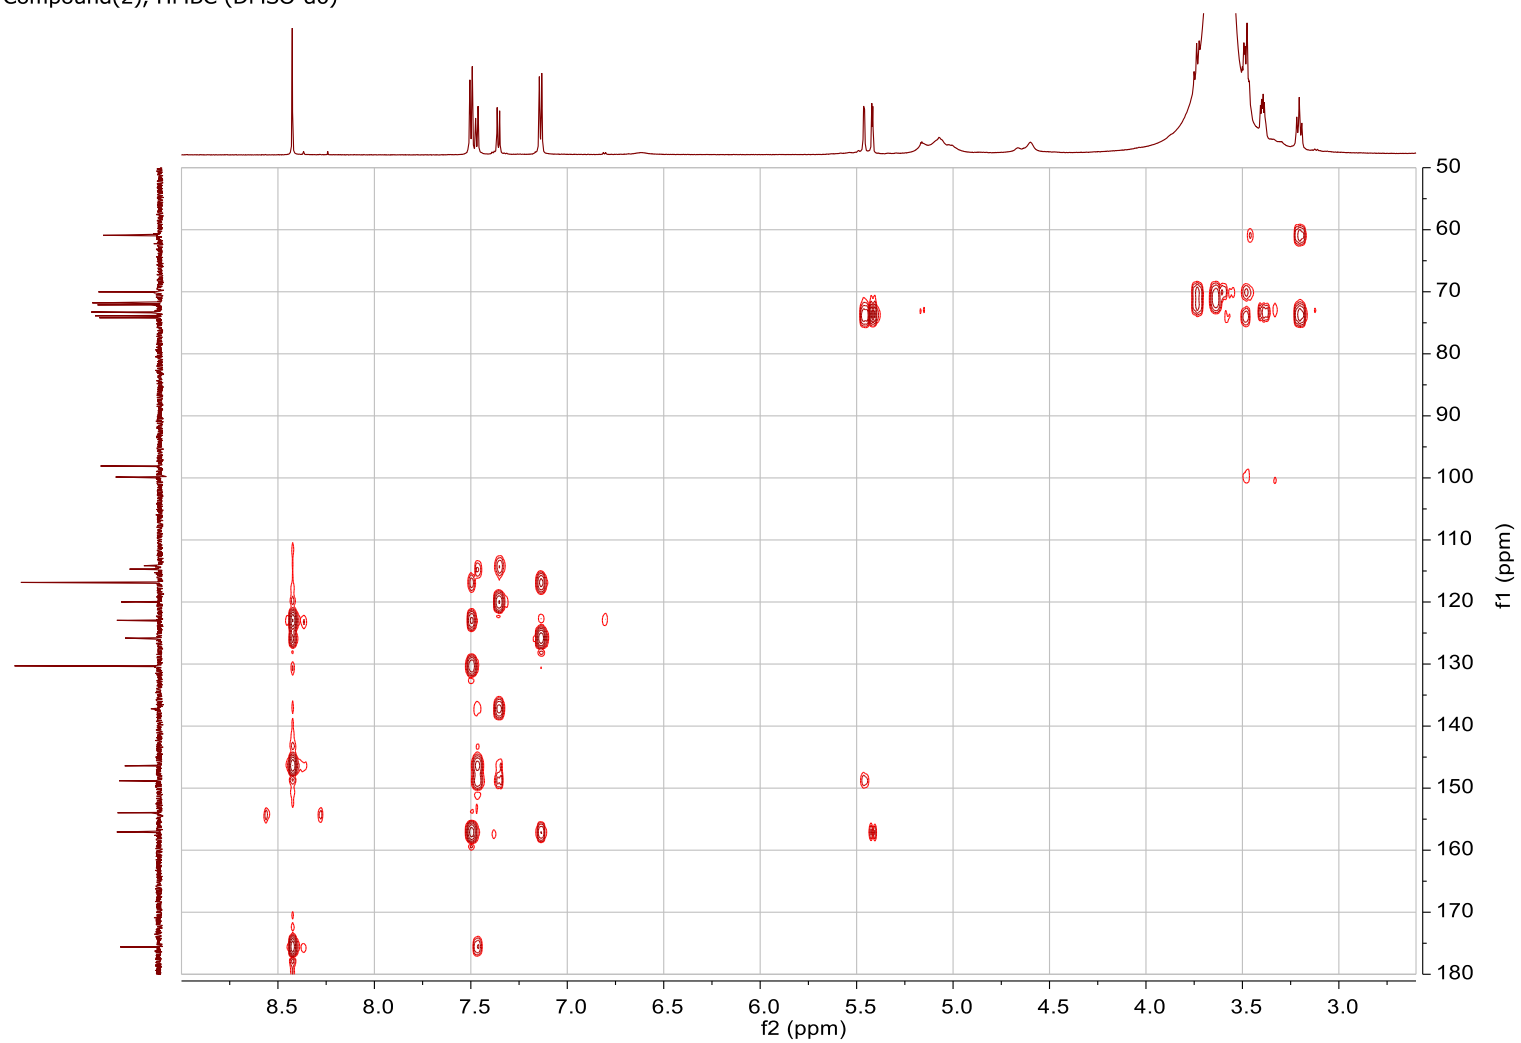

Figure S19. The HMBC (700 MHz, DMSO- $d_6$ ) spectrum of compound (2).

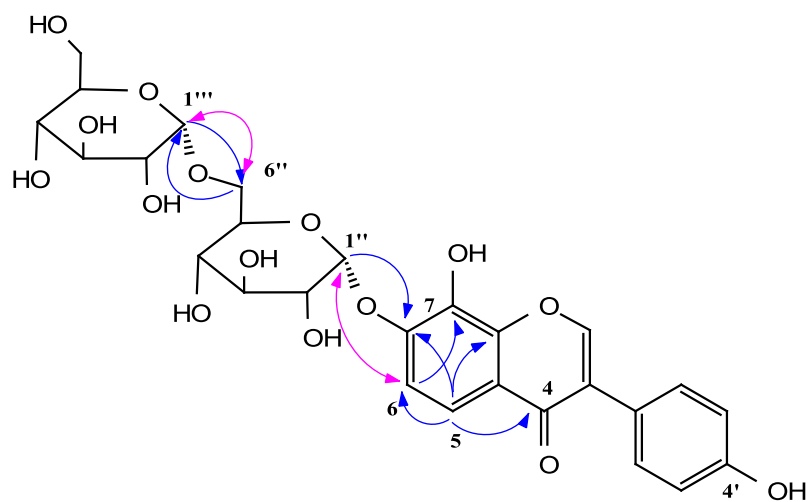

Compound (1)

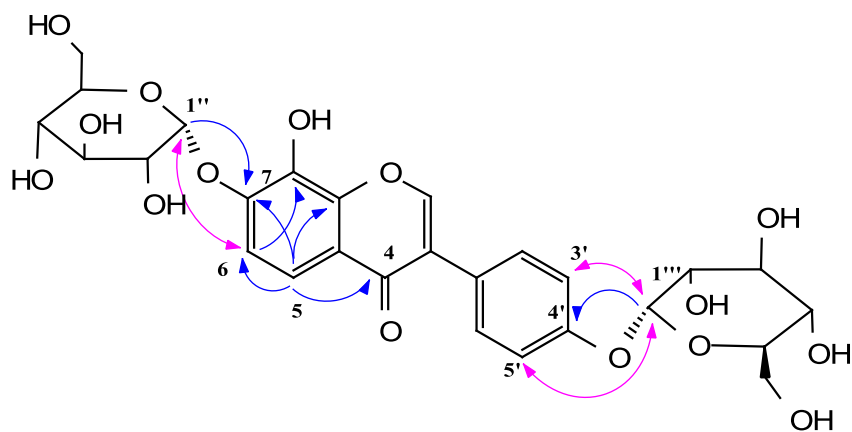

Compound (2)

Figure S20. The key HMBC and NOESY correlations of compound (1) and compound (2).
